# Supplementary material for: Health Benefits of Lactobacillus gasseri CP2305 Tablets in Young Adults Exposed to Chronic Stress: A Randomized, Double-Blind, Placebo-Controlled Study
Source: PubMed Central journal article supplement (PMC6723420; doi:10.3390/nu11081859), 2019-08-10
Supplement: nutrients-11-01859-s001.pdf [file nutrients-11-01859-s001.pdf]

Table S1. Time-dependent changes in questionnaire scores.

| Questionnaire      | Probability for each factor |         |                  | Treatment | Scores      |             |             |
|--------------------|-----------------------------|---------|------------------|-----------|-------------|-------------|-------------|
|                    | Treatment                   | Time    | Time x Treatment |           | Week 0      | Week 12     | Week 24     |
| STAI state anxiety | 0.786                       | < 0.001 | 0.670            | CP2305    | 37.1 ± 1.6  | 34.2 ± 1.5  | 45.9 ± 1.7  |
|                    |                             |         |                  | Placebo   | 35.8 ± 1.6  | 35.1 ± 1.9  | 43.4 ± 2.2  |
| STAI trait anxiety | 0.014 *                     | 0.699   | 0.093            | CP2305    | 41.8 ± 1.8  | 37.7 ± 1.6  | 39.9 ± 1.2  |
|                    |                             |         |                  | Placebo   | 39.7 ± 1.8  | 38.2 ± 1.8  | 40.8 ± 2.2  |
| HADS anxiety       | 0.072                       | 0.007   | 0.397            | CP2305    | 4.8 ± 0.5   | 4.6 ± 0.5   | 5.5 ± 0.6   |
|                    |                             |         |                  | Placebo   | 4.3 ± 0.5   | 5.4 ± 0.7   | 5.6 ± 0.7   |
| HADS depression    | 0.071                       | 0.003   | 0.800            | CP2305    | 5.8 ± 0.5   | 5.0 ± 0.6   | 7.0 ± 0.8   |
|                    |                             |         |                  | Placebo   | 5.2 ± 0.6   | 6.3 ± 0.8   | 6.7 ± 0.7   |
| GHQ-28 total       | 0.615                       | 0.013   | 0.667            | CP2305    | 4.1 ± 0.7   | 3.6 ± 0.6   | 5.0 ± 0.6   |
|                    |                             |         |                  | Placebo   | 3.7 ± 0.6   | 3.1 ± 0.6   | 4.9 ± 0.8   |
| GHQ-28 depression  | 0.022 *                     | 0.545   | 0.249            | CP2305    | 0.06 ± 0.04 | 0.00 ± 0.00 | 0.03 ± 0.03 |
|                    |                             |         |                  | Placebo   | 0.07 ± 0.07 | 0.22 ± 0.12 | 0.66 ± 0.12 |
| PSQI global score  | 0.041 *                     | 0.542   | 0.143            | CP2305    | 4.2 ± 0.4   | 4.1 ± 0.5   | 3.9 ± 0.4   |
|                    |                             |         |                  | Placebo   | 3.4 ± 0.3   | 3.9 ± 0.4   | 4.1 ± 0.5   |

Data are shown as the means ± SEM.

\*Significant different between CP2305 and placebo groups ( $p < 0.05$  by repeated-measures ANOVA).

Table S2. Time-dependent changes in salivary stress markers.

| Parameters                          | Probability for each factor |         |                  | Treatment | Values      |             |             |
|-------------------------------------|-----------------------------|---------|------------------|-----------|-------------|-------------|-------------|
|                                     | Treatment                   | Time    | Time x Treatment |           | Week 0      | Week 12     | Week 24     |
| Chromogranin A<br>(pmol/mg protein) | 0.039 *                     | 0.001   | 0.056            | CP2305    | 21.0 ± 2.8  | 13.8 ± 2.2  | 10.8 ± 2.1  |
|                                     |                             |         |                  | Placebo   | 15.2 ± 2.9  | 10.5 ± 2.2  | 12.5 ± 2.2  |
| cortisol (µg/dL)                    | 0.086                       | < 0.001 | 0.716            | CP2305    | 0.14 ± 0.02 | 0.28 ± 0.03 | 0.28 ± 0.03 |
|                                     |                             |         |                  | Placebo   | 0.14 ± 0.02 | 0.18 ± 0.03 | 0.26 ± 0.03 |

Data are shown as the means ± SEM. \*Significant different between CP2305 and placebo groups ( $p < 0.05$  by repeated-measures ANOVA).

Table S3. Time-dependent changes in stool properties and bowel habits.

| Questionnaire                  | Probability for each factor |       |                  | Treatment | Scores     |            |            |
|--------------------------------|-----------------------------|-------|------------------|-----------|------------|------------|------------|
|                                | Treatment                   | Time  | Time x Treatment |           | Week 0     | Week 12    | Week 24    |
| Frequency of<br>bowel movement | 0.965                       | 0.533 | 0.987            | CP2305    | 9.6 ± 0.7  | 9.5 ± 0.8  | 9.4 ± 1.0  |
|                                |                             |       |                  | Placebo   | 9.2 ± 0.8  | 9.2 ± 1.1  | 9.1 ± 0.7  |
| Output                         | 0.677                       | 0.356 | 0.833            | CP2305    | 25.3 ± 2.4 | 25.4 ± 2.3 | 24.2 ± 2.1 |
|                                |                             |       |                  | Placebo   | 26.0 ± 3.1 | 25.0 ± 4.0 | 24.6 ± 2.5 |
| Form                           | 0.546                       | 0.011 | 0.791            | CP2305    | 4.0 ± 0.1  | 4.0 ± 0.1  | 3.7 ± 0.1  |
|                                |                             |       |                  | Placebo   | 4.0 ± 0.1  | 3.6 ± 0.2  | 3.7 ± 0.2  |
| Color                          | 0.002 *                     | 0.320 | 0.079            | CP2305    | 3.5 ± 0.1  | 3.6 ± 0.2  | 3.6 ± 0.1  |
|                                |                             |       |                  | Placebo   | 3.6 ± 0.1  | 3.2 ± 0.1  | 3.3 ± 0.1  |

Data are shown the means ± SEM.

\*Significant different between CP2305 and placebo groups ( $p < 0.05$  by repeated-measures ANOVA).

Table S4. Gender-stratified analysis of salivary cortisol.

| Parameters | Probability for each factor |         |                  | Treatment | Values ( $\mu\text{g/dL}$ ) |                 |                 |
|------------|-----------------------------|---------|------------------|-----------|-----------------------------|-----------------|-----------------|
|            | Treatment                   | Time    | Time x Treatment |           | Week 0                      | Week 12         | Week 24         |
| Women      | 0.251                       | 0.016   | 0.645            | CP2305    | $0.14 \pm 0.03$             | $0.26 \pm 0.06$ | $0.29 \pm 0.08$ |
|            |                             |         |                  | Placebo   | $0.11 \pm 0.02$             | $0.13 \pm 0.02$ | $0.21 \pm 0.05$ |
| Men        | 0.208                       | < 0.001 | 0.926            | CP2305    | $0.14 \pm 0.02$             | $0.28 \pm 0.04$ | $0.28 \pm 0.04$ |
|            |                             |         |                  | Placebo   | $0.15 \pm 0.03$             | $0.21 \pm 0.03$ | $0.28 \pm 0.03$ |

Data are shown as the means  $\pm$  SEM. Probability for each factor was analyzed using two-way ANOVA with repeated measures.
